# Supplementary material for: Mid- and End-of-the-Century Estimation of Agricultural Suitability of California’s Specialty Crops
Source: MDPI journal article supplement (doi:10.3390/land12101907), 2023-10-11
Supplement: s1 [file s1]

Archive with 1 entries (1 files):
- land-2525721-supplementary.pdf
