# Supplementary material for: Mid- and End-of-the-Century Estimation of Agricultural Suitability of California’s Specialty Crops
Source: MDPI journal article supplement (doi:10.3390/land12101907), 2023-10-11
Supplement: s1 [file s1 › land-2525721-supplementary.pdf]

**Table S1. Table with environmental variables from Table 2 and the corresponding variable name used for MaxEnt analysis.**

| <b>Variable</b> | <b>Variable name</b> |
|-----------------|----------------------|
| bio1            | bio_1                |
| bio2            | bio_2                |
| bio3            | bio_3                |
| bio4            | bio_4                |
| bio5            | bio_5                |
| bio6            | bio_6                |
| bio7            | bio_7                |
| bio8            | bio_8                |
| bio9            | bio_9                |
| bio10           | bio_10               |
| bio11           | bio_11               |
| bio12           | bio_12               |
| bio13           | bio_13               |
| bio14           | bio_14               |
| bio15           | bio_15               |
| bio16           | bio_16               |
| bio17           | bio_17               |
| bio18           | bio_18               |
| bio19           | bio_19               |
| elevation       | elev                 |
| slope           | slp_01               |
| aspect          | asp_01               |
| land            | cal_10               |

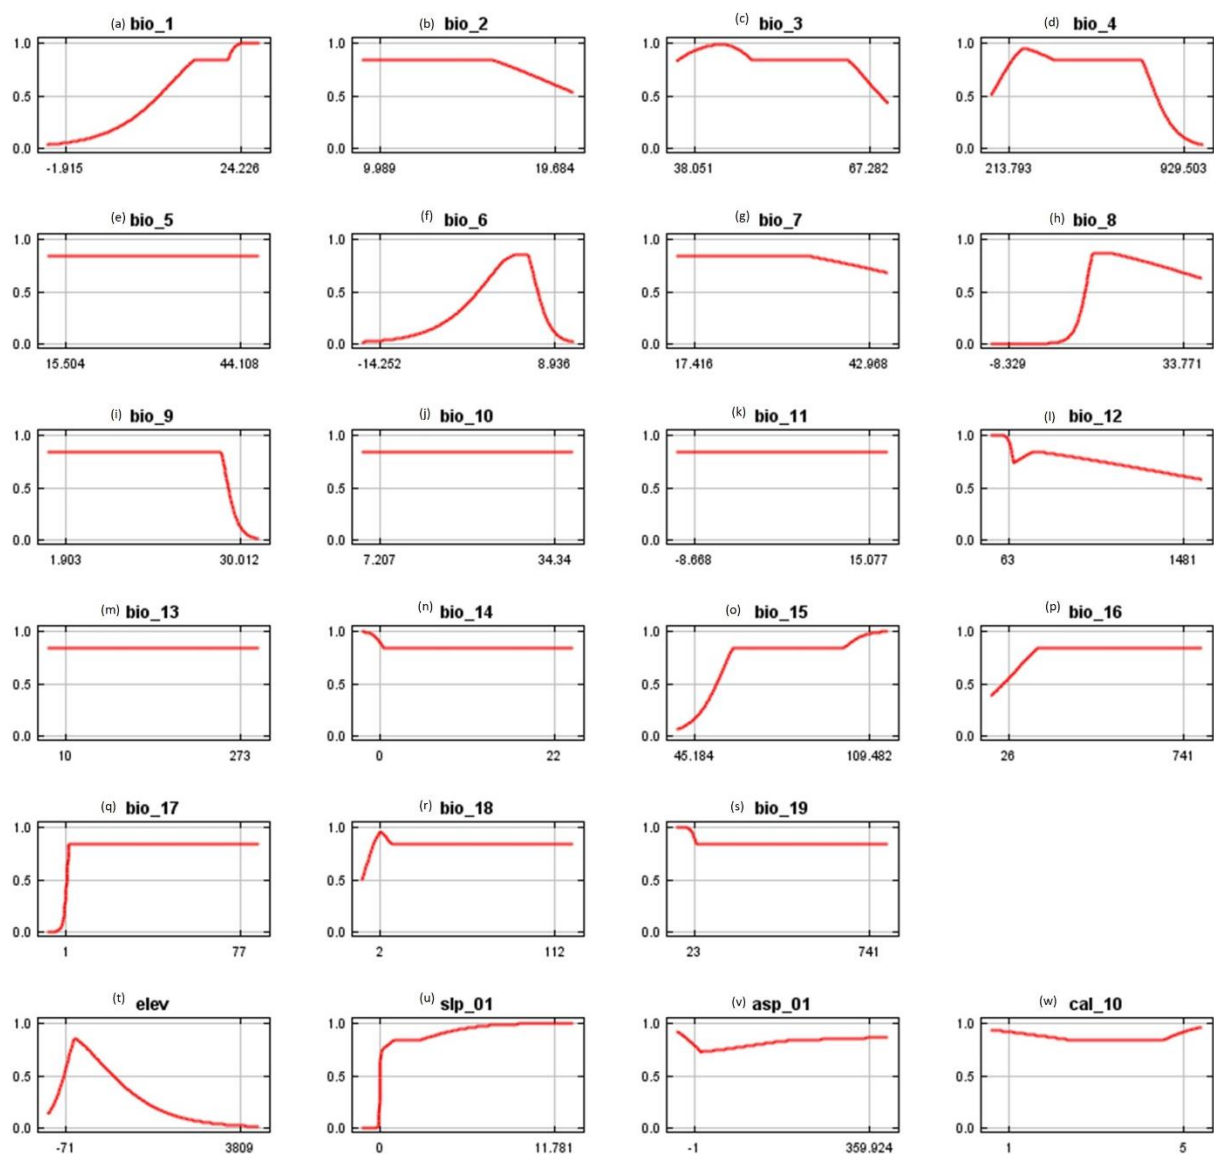

Figure S1. Marginal response curves for environmental variables (a – w) for the citrus MaxEnt model. The curves show how the predicted probability of presence estimated by MaxEnt responds as each environmental variable is varied, while maintaining all other environmental variables at their average sample value.

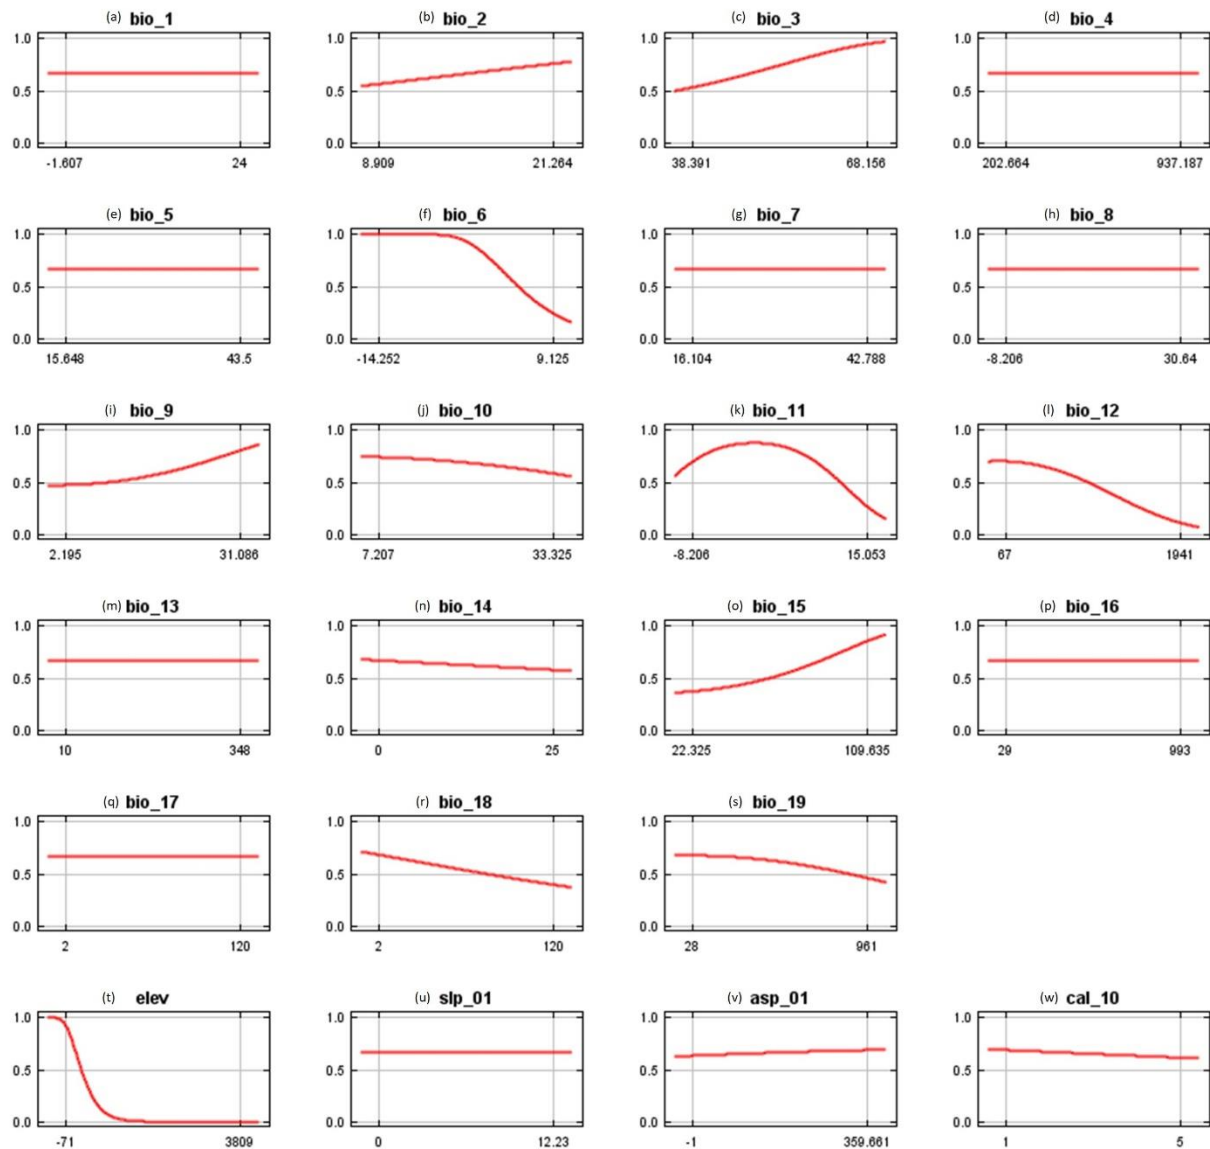

Figure S2. Marginal response curves for environmental variables (a – w) for the almonds MaxEnt model. The curves show how the predicted probability of presence estimated by MaxEnt responds as each environmental variable is varied, while maintaining all other environmental variables at their average sample value.

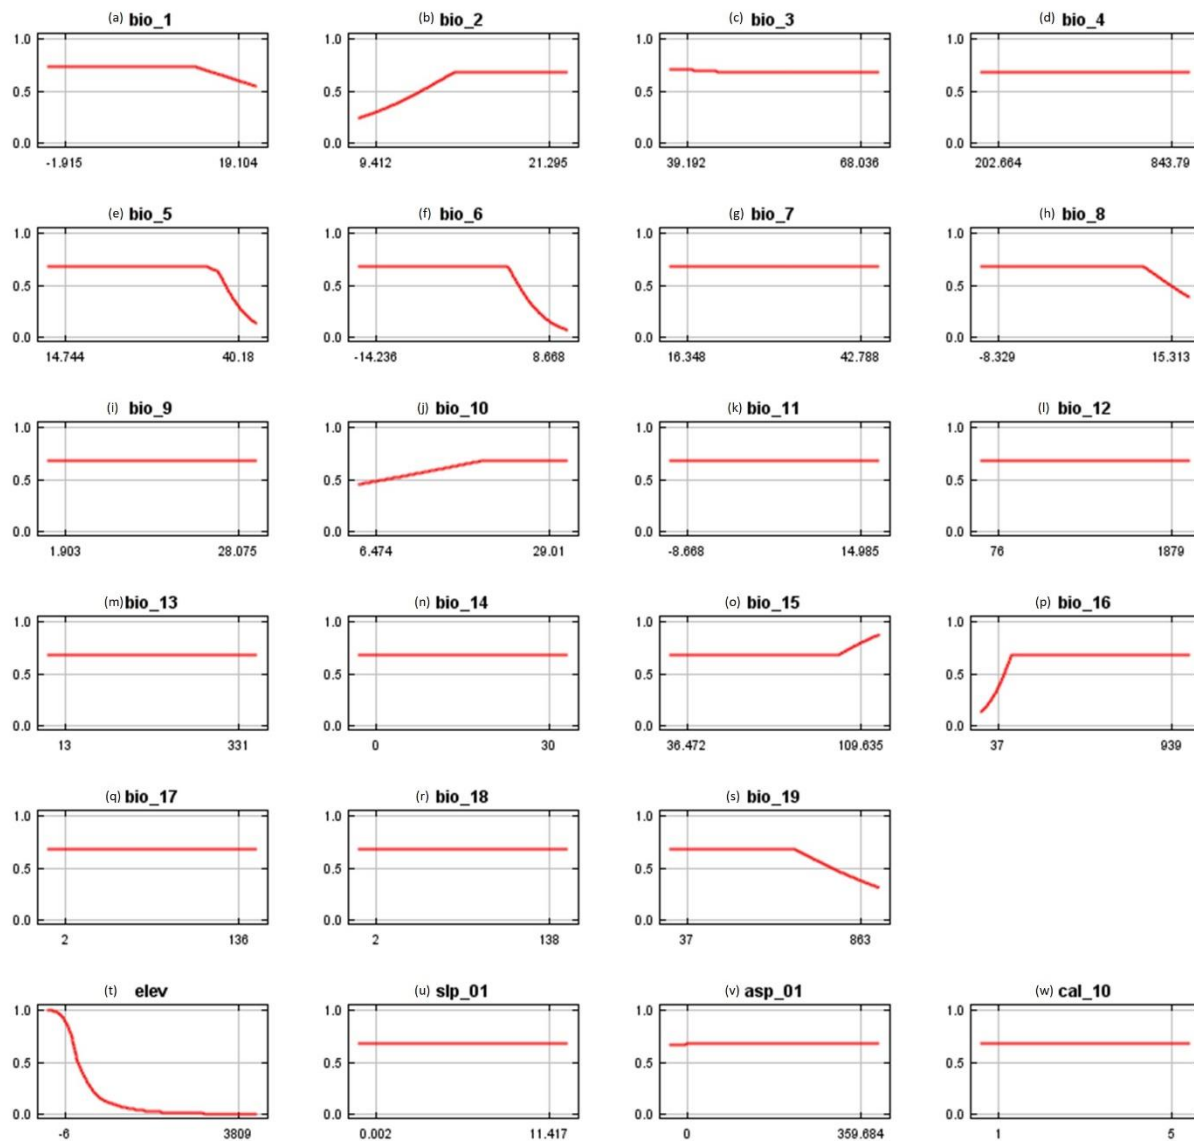

Figure S3. Marginal response curves for environmental variables (a – w) for the walnuts MaxEnt model. The curves show how the predicted probability of presence estimated by MaxEnt responds as each environmental variable is varied, while maintaining all other environmental variables at their average sample value.

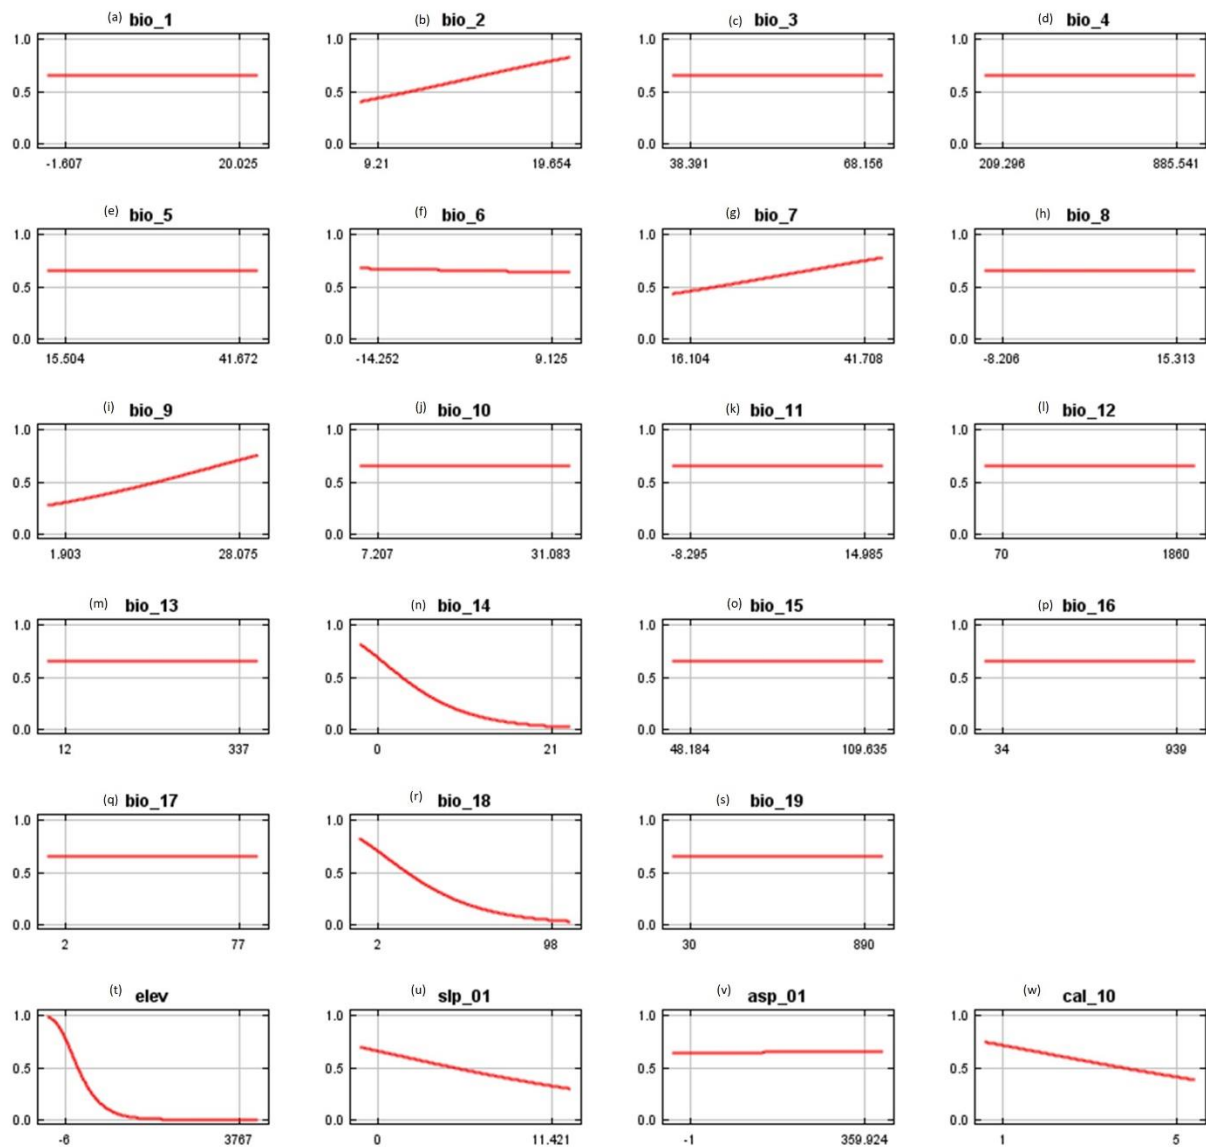

Figure S4. Marginal response curves for environmental variables (a – w) for the pistachios MaxEnt model. The curves show how the predicted probability of presence estimated by MaxEnt responds as each environmental variable is varied, while maintaining all other environmental variables at their average sample value.
